# Supplementary material
Source: PubMed Central journal article supplement (PMC5676231)
Supplement: 993TableS1.pdf [file 993TableS1.pdf]

**Table S1: Absolute and additional values for normalized and presented data.**

| Figure | Label           | Genotype                                                                                | Picδ1-PH-GFP Intensity (% wild type)   | n  | P Value (significance) |
|--------|-----------------|-----------------------------------------------------------------------------------------|----------------------------------------|----|------------------------|
| 3A,B   | Control         | <i>w<sup>1118</sup>; OK6-Gal4/+; UAS-PLCδ-PH-GFP/+</i>                                  | 100<br>(5.121)                         | 11 |                        |
| 3A,B   | <i>Esy</i> t    | <i>w<sup>1118</sup>; OK6-Gal4/+; Esyt<sup>1</sup>/Esy<sup>t2</sup>; UAS-PLCδ-PH-GFP</i> | 119.211<br>(8.986)                     | 11 | 0.0780 (ns)            |
| 3A,B   | <i>Esy</i> t-OE | <i>w<sup>1118</sup>; OK6-Gal4/+; UAS-PLCδ1-PH-GFP/UAS-Esy<sup>tFlag</sup>;</i>          | 137.201<br>(17.707)                    | 12 | 0.0658 (ns)            |
| Figure | Label           | Genotype                                                                                | GFP-myc-2xFYVE Intensity (% wild type) | n  | P Value (significance) |
| 3C,D   | Control         | <i>w<sup>1118</sup>; OK6-Gal4/UAS-GFP-myc-2xFYVE</i>                                    | 100<br>(3.618)                         | 10 |                        |
| 3C,D   | <i>Esy</i> t    | <i>w<sup>1118</sup>; OK6-Gal4/UAS-GFP-myc-2xFYVE; Esyt<sup>1</sup>/Esy<sup>t2</sup></i> | 100.167<br>(5.491)                     | 11 | 0.9804 (ns)            |
| 3C,D   | <i>Esy</i> t-OE | <i>w<sup>1118</sup>; OK6-Gal4/UAS-GFP-myc-2xFYVE; UAS-Esy<sup>tFlag</sup>/+</i>         | 109.861<br>(4.552)                     | 13 | 0.1209 (ns)            |

| Figure    | Label           | Genotype                                                   | Bouton Number     | Neuronal Membrane Surface Area (μm <sup>2</sup> ) | BRP #/NMJ           | BRP Density (μm <sup>2</sup> ) | BRP Area (μm <sup>2</sup> ) | n  | P Value (significance: Bouton #, Membrane Surface Area, BRP #/NMJ, BRP Density, BRP Area) |
|-----------|-----------------|------------------------------------------------------------|-------------------|---------------------------------------------------|---------------------|--------------------------------|-----------------------------|----|-------------------------------------------------------------------------------------------|
| 4A-F      | wild type       | <i>w<sup>1118</sup></i>                                    | 31.750<br>(2.972) | 280.067<br>(25.205)                               | 337.500<br>(26.839) | 1.234<br>(0.054)               | 59.578<br>(4.766)           | 12 |                                                                                           |
| 4A-F      | <i>Esy</i> t    | <i>w<sup>1118</sup>; Esyt<sup>1</sup>/Esy<sup>t2</sup></i> | 32.818<br>(2.423) | 313.736<br>(24.891)                               | 338.091<br>(20.662) | 1.137<br>(0.094)               | 63.103<br>(4.353)           | 11 | 0.7856 (ns),<br>0.3539 (ns),<br>0.9864 (ns),<br>0.3764 (ns),<br>0.7695 (ns)               |
| 4A-F      | <i>Esy</i> t-OE | <i>w<sup>1118</sup>; OK6-Gal4/UAS-Esy<sup>tFlag</sup></i>  | 46.000<br>(2.799) | 445.615<br>(32.373)                               | 486.167<br>(26.754) | 1.110<br>(0.044)               | 80.273<br>(6.931)           | 12 | 0.0021 (**),<br>0.0006 (***),<br>0.0007 (***),<br>0.0912 (ns),<br>0.3622 (ns)             |
| Not shown | NA              | <i>w<sup>1118</sup>; OK6-Gal4/UAS-Esy<sup>tMCh</sup></i>   | 49.700<br>(3.114) | 473.291<br>(37.492)                               | 512.800<br>(38.086) | 1.102<br>(0.051)               | 86.131<br>(6.687)           | 10 | 0.0005 (***),<br>0.0003 (***),<br>0.0010 (***),<br>0.0956 (ns),<br>0.5455 (ns)            |

| Figure | Label               | Genotype                                                                                     | [Ca <sup>2+</sup> ] | mEPSC amplitude (pA) | mEPSC frequency (Hz) | EPSC (nA)           | QC                 | Input Resistance (MΩ) | Leak Current (nA) | n  | P Value (significance: mEPSC amp, mEPSC freq, EPSC, QC)    |
|--------|---------------------|----------------------------------------------------------------------------------------------|---------------------|----------------------|----------------------|---------------------|--------------------|-----------------------|-------------------|----|------------------------------------------------------------|
| 5A-D   | wild type           | <i>w<sup>1118</sup></i>                                                                      | 0.4                 | -521.184<br>(34.236) | 2.740<br>(0.314)     | -48.786<br>(13.471) | 96.867<br>(28.767) | 9.375<br>(0.375)      | -3.033<br>(0.493) | 7  |                                                            |
| 5A-D   | <i>Esy</i> t        | <i>w<sup>1118</sup>; Esyt<sup>1</sup>/Esy<sup>t2</sup></i>                                   | 0.4                 | -539.886<br>(19.112) | 2.877<br>(0.228)     | -21.445<br>(5.505)  | 40.805<br>(10.995) | 7.455<br>(0.638)      | -2.646<br>(0.711) | 9  | 0.6120 (ns),<br>0.7274 (ns),<br>0.0458 (*),<br>0.0489 (*)  |
| 5A-D   | <i>Esy</i> t rescue | <i>w<sup>1118</sup>; OK6-Gal4/UAS-Esy<sup>tFlag</sup>; Esyt<sup>1</sup>/Esy<sup>t2</sup></i> | 0.4                 | -436.698<br>(9.558)  | 2.667<br>(0.553)     | -41.852<br>(5.251)  | 96.388<br>(12.850) | 8.286<br>(0.787)      | -4.482<br>(2.851) | 9  | 0.0105 (*),<br>0.9053 (ns),<br>0.5761 (ns),<br>0.9862 (ns) |
| 5A-D   | <i>Esy</i> t-OE     | <i>w<sup>1118</sup>; OK6-Gal4/UAS-Esy<sup>tFlag</sup></i>                                    | 0.4                 | -453.664<br>(16.148) | 2.019<br>(0.180)     | -45.744<br>(7.691)  | 93.523<br>(18.061) | 8.667<br>(0.575)      | -1.760<br>(0.309) | 15 | 0.0518 (ns),<br>0.0450 (*),<br>0.8458 (ns),<br>0.9233 (ns) |

| Figure | Label       | Genotype                                                                                     | [Ca <sup>2+</sup> ] | mEPSC amplitude (pA) | EPSC (nA)         | QC               | Input Resistance (MΩ) | Leak Current (nA) | n  | P Value (significance: QC) |
|--------|-------------|----------------------------------------------------------------------------------------------|---------------------|----------------------|-------------------|------------------|-----------------------|-------------------|----|----------------------------|
| 5D     | wild type   | <i>w<sup>1118</sup></i>                                                                      | 1.5                 | -450.666 (24.021)    | -121.851 (13.781) | 275.466 (33.501) | 10.286 (1.728)        | -3.471 (1.284)    | 7  |                            |
| 5D     | <i>Esyt</i> | <i>w<sup>1118</sup>; Esyt<sup>1</sup>/Esys<sup>2</sup></i>                                   | 1.5                 | -412.004 (9.141)     | -74.990 (8.278)   | 187.452 (25.777) | 11.375 (1.165)        | -1.865 (0.997)    | 14 | 0.0212 (*)                 |
| 5D     | Esyt-OE     | <i>w<sup>1118</sup>; OK6-Gal4/UAS-Esyt<sup>Flag</sup></i>                                    | 1.5                 | -424.308 (12.000)    | -122.506 (7.006)  | 288.902 (15.404) | 8.500 (1.000)         | -4.233 (0.952)    | 8  | 0.7095 (ns)                |
| 5D     | wild type   | <i>w<sup>1118</sup></i>                                                                      | 3.0                 | -468.450 (16.126)    | -235.727 (12.185) | 507.770 (29.561) | 11.200 (1.526)        | -3.682 (0.332)    | 10 |                            |
| 5D     | <i>Esyt</i> | <i>w<sup>1118</sup>; Esyt<sup>1</sup>/Esys<sup>2</sup></i>                                   | 3.0                 | -543.625 (21.252)    | -175.172 (18.352) | 323.801 (34.036) | 7.375 (0.680)         | -4.522 (0.577)    | 8  | 0.0008 (***)               |
| 5D     | Esyt rescue | <i>w<sup>1118</sup>; OK6-Gal4/UAS-Esyt<sup>Flag</sup>; Esyt<sup>1</sup>/Esys<sup>2</sup></i> | 3.0                 | -432.083 (9.491)     | -232.206 (20.847) | 537.128 (46.699) | 7.625 (0.532)         | -3.046 (0.282)    | 8  | 0.5882 (ns)                |
| 5D     | Esyt-OE     | <i>w<sup>1118</sup>; OK6-Gal4/UAS-Esyt<sup>Flag</sup></i>                                    | 3.0                 | -463.322 (27.241)    | -243.366 (16.005) | 541.470 (57.371) | 7.625 (0.800)         | -3.612 (0.502)    | 7  | 0.5780 (ns)                |

| Figure | Label                         | Genotype                                                                                     | [Ca <sup>2+</sup> ] | EPSC 1 (nA)       | EPSC 2 (nA)       | EPSC 3 (nA)       | EPSC 4 (nA)       | PPR (EPSC4/EPSC1) | n  | P Value (significance: PPR) |
|--------|-------------------------------|----------------------------------------------------------------------------------------------|---------------------|-------------------|-------------------|-------------------|-------------------|-------------------|----|-----------------------------|
| 5E,F   | wild type                     | <i>w<sup>1118</sup></i>                                                                      | 0.4                 | -48.786 (13.471)  | -58.458 (15.204)  | -59.546 (15.006)  | -64.168 (13.139)  | 1.494 (0.192)     | 8  |                             |
| 5E,F   | <i>Esyt</i>                   | <i>w<sup>1118</sup>; Esyt<sup>1</sup>/Esys<sup>2</sup></i>                                   | 0.4                 | -21.445 (5.505)   | -25.338 (4.967)   | -33.088 (4.871)   | -39.937 (4.998)   | 2.746 (0.495)     | 9  | 0.0405 (*)                  |
| 5E,F   | <i>Esyt</i> + neuronal rescue | <i>w<sup>1118</sup>; OK6-Gal4/UAS-Esyt<sup>Flag</sup>; Esyt<sup>1</sup>/Esys<sup>2</sup></i> | 0.4                 | -41.852 (5.251)   | -50.389 (5.596)   | -53.090 (6.214)   | -56.064 (6.297)   | 1.358 (0.050)     | 9  | 0.3932 (ns)                 |
| 5E,F   | Esyt-OE                       | <i>w<sup>1118</sup>; OK6-Gal4/UAS-Esyt<sup>Flag</sup></i>                                    | 0.4                 | -45.744 (7.692)   | -53.576 (7.062)   | -59.997 (6.989)   | -67.920 (6.600)   | 1.915 (0.216)     | 15 | 0.3013 (ns)                 |
| 5G,H   | wild type                     | <i>w<sup>1118</sup></i>                                                                      | 3.0                 | -235.728 (12.186) | -176.158 (14.671) | -158.895 (13.545) | -145.829 (12.728) | 0.613 (0.032)     | 10 |                             |
| 5G,H   | <i>Esyt</i>                   | <i>w<sup>1118</sup>; Esyt<sup>1</sup>/Esys<sup>2</sup></i>                                   | 3.0                 | -175.173 (18.352) | -156.200 (14.530) | -157.531 (12.401) | -142.820 (10.817) | 0.859 (0.076)     | 8  | 0.0053 (**)                 |
| 5G,H   | <i>Esyt</i> + neuronal rescue | <i>w<sup>1118</sup>; OK6-Gal4/UAS-Esyt<sup>Flag</sup>; Esyt<sup>1</sup>/Esys<sup>2</sup></i> | 3.0                 | -232.206 (20.848) | -161.540 (14.482) | -150.038 (13.173) | -131.543 (11.281) | 0.569 (0.013)     | 8  | 0.2539 (ns)                 |
| 5G,H   | Esyt-OE                       | <i>w<sup>1118</sup>; OK6-Gal4/UAS-Esyt<sup>Flag</sup></i>                                    | 3.0                 | -243.367 (16.005) | -196.454 (11.530) | -184.588 (12.270) | -169.124 (12.732) | 0.691 (0.028)     | 7  | 0.1013 (ns)                 |

| Figure | Label       | Genotype                                                   | Total quanta released | n | P Value (significance) |
|--------|-------------|------------------------------------------------------------|-----------------------|---|------------------------|
| 6A,B   | wild type   | <i>w<sup>1118</sup></i>                                    | 170746.2 (13327.07)   | 7 |                        |
| 6A,B   | <i>Esyt</i> | <i>w<sup>1118</sup>; Esyt<sup>1</sup>/Esys<sup>2</sup></i> | 185279.4 (20449.02)   | 6 | 0.5526 (ns)            |
| 6A,B   | Esyt-OE     | <i>w<sup>1118</sup>; OK6-GAL4/UAS-Esyt<sup>Flag</sup></i>  | 286885.4 (7323.839)   | 7 | <0.0001 (***)          |

| Figure | Label       | Genotype                                                   | Synaptic Vesicle Density (#/μm <sup>2</sup> ) | Synaptic Vesicle Number within 300nm of AZ | T Bar Length (nm) | Active Zone Length (nm) | n (SV Density, SV#, T bar length, AZ length) | P Value (significance: SV Density, SV # within 300nm of AZ, T Bar Length, AZ Length) |
|--------|-------------|------------------------------------------------------------|-----------------------------------------------|--------------------------------------------|-------------------|-------------------------|----------------------------------------------|--------------------------------------------------------------------------------------|
| 7A-E   | wild type   | <i>w<sup>1118</sup></i>                                    | 120.095 (18.270)                              | 267.100 (13.934)                           | 178.061 (17.930)  | 618.601 (48.895)        | 11,18,14,21                                  |                                                                                      |
| 7A-E   | <i>Esyt</i> | <i>w<sup>1118</sup>; Esyt<sup>1</sup>/Esys<sup>2</sup></i> | 105.311 (17.145)                              | 231.480 (12.717)                           | 166.827 (12.947)  | 597.936 (30.003)        | 8,14,9,24                                    | 0.5769 (ns), 0.0762 (ns), 0.6548 (ns), 0.7131 (ns)                                   |

|      |        |                                      |                    |                    |                     |                     |             |                                                             |
|------|--------|--------------------------------------|--------------------|--------------------|---------------------|---------------------|-------------|-------------------------------------------------------------|
| 7A-E | Esy-OE | $w^{1118}; OK6-Gal4/UAS-Esyt^{Flag}$ | 94.309<br>(11.161) | 238.215<br>(8.299) | 183.306<br>(16.969) | 507.527<br>(35.967) | 10,30,14,31 | 0.2545 (ns),<br>0.0641 (ns),<br>0.8334 (ns),<br>0.0673 (ns) |
|------|--------|--------------------------------------|--------------------|--------------------|---------------------|---------------------|-------------|-------------------------------------------------------------|

| Figure | Label       | Genotype                             | FM1-43 Intensity<br>(% wild type) | n  | P Value<br>(significance) |
|--------|-------------|--------------------------------------|-----------------------------------|----|---------------------------|
| 7F,G   | wild type   | $w^{1118}$                           | 100<br>(5.584)                    | 10 |                           |
| 7F,G   | <i>Esyt</i> | $w^{1118}; Esyt^1/Esyt^2$            | 102.545<br>(4.869)                | 11 | 0.7338 (ns)               |
| 7F,G   | Esy-OE      | $w^{1118}; OK6-Gal4/UAS-Esyt^{Flag}$ | 84.487<br>(4.990)                 | 8  | 0.0606 (ns)               |

| Figure | Label       | Genotype                             | [Ca <sup>2+</sup> ] | PhTx | mEPSC<br>(pA)        | EPSC<br>(nA)        | QC                  | Leak<br>Current (nA) | n  | P Value<br>(significance:<br>mEPSC amp,<br>EPSC, QC) |
|--------|-------------|--------------------------------------|---------------------|------|----------------------|---------------------|---------------------|----------------------|----|------------------------------------------------------|
| 8A,B   | wild type   | $w^{1118}$                           | 0.4                 | -    | -521.184<br>(34.236) | -48.786<br>(13.471) | 96.867<br>(28.767)  | -3.033<br>(0.493)    | 7  |                                                      |
| 8A,B   | wild type   | $w^{1118}$                           | 0.4                 | +    | -247.505<br>(11.750) | -33.785<br>(1.855)  | 142.951<br>(11.613) | -6.737<br>(0.497)    | 17 |                                                      |
| 8A,B   | <i>Esyt</i> | $w^{1118}; Esyt^1/Esyt^2$            | 0.4                 | -    | -539.886<br>(19.112) | -21.445<br>(5.505)  | 40.805<br>(10.995)  | -2.646<br>(0.711)    | 9  | 0.6120 (ns),<br>0.0458 (*),<br>0.0489 (*)            |
| 8A,B   | <i>Esyt</i> | $w^{1118}; Esyt^1/Esyt^2$            | 0.4                 | +    | -294.331<br>(13.337) | -21.815<br>(3.173)  | 74.209<br>(10.868)  | -2.716<br>(0.485)    | 11 |                                                      |
| 8A,B   | Esy-OE      | $w^{1118}; OK6-Gal4/UAS-Esyt^{Flag}$ | 0.4                 | -    | -453.664<br>(16.148) | -45.744<br>(7.691)  | 93.523<br>(18.061)  | -1.760<br>(0.309)    | 15 | 0.0597 (ns),<br>0.8458 (ns),<br>0.9233 (ns)          |
| 8A,B   | Esy-OE      | $w^{1118}; OK6-Gal4/UAS-Esyt^{Flag}$ | 0.4                 | +    | -240.749<br>(17.108) | -36.660<br>(3.297)  | 160.813<br>(17.770) | -1.719<br>(0.291)    | 12 |                                                      |

The figure and panel, genotype, and conditions used are noted (external calcium concentration as well as whether PhTx was applied or not). Average values with standard error values noted in parentheses are shown for all morphology data such as neuronal membrane surface area, bouton number, BRP number, BRP density, BRP area as well as intensity values. For electrophysiological experiments, all passive membrane properties (input resistance, leak current) and mEPSC, EPSC, QC, number of data samples (n), p-values from statistical test are shown, with standard error values noted in parentheses.
